# Supplementary material for: Development of a Green Downstream Process for the Valorization of Porphyridium cruentum Biomass
Source: PubMed Central journal article supplement (PMC6515528; doi:10.3390/molecules24081564), 2019-04-20
Supplement: molecules-24-01564-s001.pdf [file molecules-24-01564-s001.pdf]

**ELECTRONIC SUPPLEMENTARY MATERIAL TO:**

**Development of a green downstream process for the valorization of**

***Porphyridium cruentum* biomass.**

Rocío Gallego, Marina Martínez, A. Cifuentes, Elena Ibáñez, Miguel Herrero\*

Laboratory of Foodomics, Institute of Food Science Research (CIAL, CSIC-UAM), Calle

Nicolás Cabrera 9, 28049 – Madrid, Spain

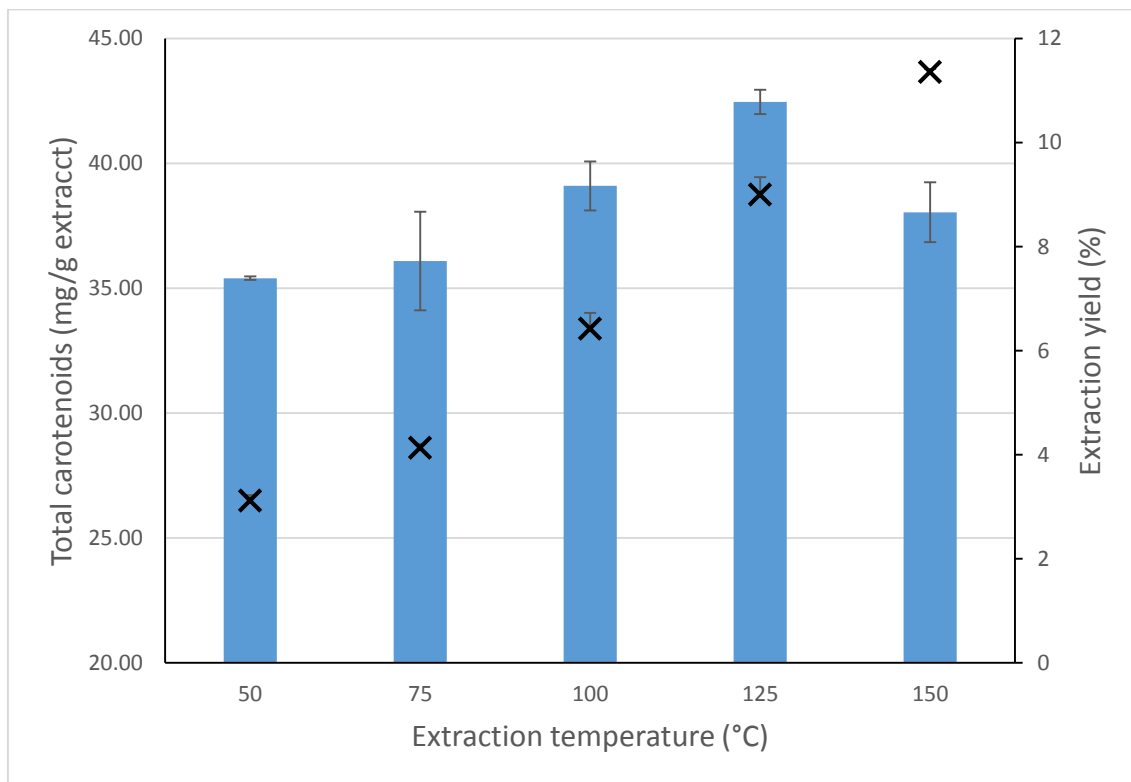

**Figure S1.** Total carotenoids amounts (bars) and extraction yield (x) obtained after the pressurized ethanol extraction of *Porphyridium cruentum* biomass at the indicated extraction temperatures.
